# Supplementary material for: Use of a promiscuous, constitutively-active bacterial enhancer-binding protein to define the σ54 (RpoN) regulon of Salmonella Typhimurium LT2
Source: PubMed Central journal article supplement (PMC3844500; doi:10.1186/1471-2164-14-602), 2013-09-05
Supplement: 1471-2164-14-602-S1.pdf [file 1471-2164-14-602-S1.pdf]

**Additional File 1: Microarray results for WT and  $\Delta rpoN$  *S. Typhimurium* LT2 strains expressing DctD250**

| <b>Locus Tag<sup>a</sup></b>                                                   | <b>Gene Symbol</b> | <b>Function</b>                         | <b>WT/<math>\Delta rpoN</math><sup>b</sup></b> |
|--------------------------------------------------------------------------------|--------------------|-----------------------------------------|------------------------------------------------|
| <b><i>Known <math>\sigma^{54}</math>-dependent operons and sRNA genes:</i></b> |                    |                                         |                                                |
| <b>STM0368</b>                                                                 | <i>prpB</i>        | Propionate catabolism (putative)        | <b>45</b>                                      |
| <b>STM0369</b>                                                                 | <i>prpC</i>        |                                         | <b>25</b>                                      |
| <b>STM0370</b>                                                                 | <i>prpD</i>        |                                         | <b>72</b>                                      |
| <b>STM0371</b>                                                                 | <i>prpE</i>        |                                         | <b>21<sup>c</sup></b>                          |
| <b>STM0830</b>                                                                 | <i>glnH</i>        | Glutamine high-affinity transporter     | <b>7.1</b>                                     |
| <b>STM0829</b>                                                                 | <i>glnP</i>        |                                         | <b>2.4</b>                                     |
| <b>STM0828</b>                                                                 | <i>glnQ</i>        |                                         | <b>2.9</b>                                     |
| <b>STM2355</b>                                                                 | <i>argT</i>        | Lysine/arginine/ornithine transport     | <b>3.5</b>                                     |
| <b>STM_R0152</b>                                                               | <i>tke1</i>        | GlmY sRNA                               | <b>0.9</b>                                     |
| <b>STM_R0167</b>                                                               | <i>sraJ</i>        | GlmZ sRNA                               | <b>1.1</b>                                     |
| <b>STM4007</b>                                                                 | <i>glnA</i>        | Glutamine synthetase                    | <b>48</b>                                      |
| <b>STM4006</b>                                                                 | <i>glnL</i>        |                                         | <b>3.5</b>                                     |
| <b>STM4005</b>                                                                 | <i>glnG</i>        |                                         | <b>3.6</b>                                     |
| <b><i>Predicted <math>\sigma^{54}</math>-dependent operons:</i></b>            |                    |                                         |                                                |
| <b>STM0462</b>                                                                 | <i>glnK</i>        | Nitrogen regulatory protein pII         | <b>3.6</b>                                     |
| <b>STM0463</b>                                                                 | <i>amtB</i>        | Ammonium transport (putative)           | <b>190</b>                                     |
| <b>STM0577</b>                                                                 |                    | PTS system (putative)                   | <b>67</b>                                      |
| <b>STM0576</b>                                                                 |                    |                                         | <b>3.8</b>                                     |
| <b>STM0575</b>                                                                 |                    |                                         | <b>3.5</b>                                     |
| <b>STM0574</b>                                                                 |                    |                                         | <b>59</b>                                      |
| <b>STM0573</b>                                                                 |                    |                                         | <b>18</b>                                      |
| <b>STM0572</b>                                                                 |                    |                                         | <b>23</b>                                      |
| <b>STM0649.S</b>                                                               |                    | Hydrolase (putative)                    | <b>11</b>                                      |
| <b>STM0650</b>                                                                 |                    |                                         | <b>42</b>                                      |
| <b>STM0651</b>                                                                 |                    |                                         | <b>8.8</b>                                     |
| <b>STM0652</b>                                                                 |                    |                                         | <b>1.2</b>                                     |
| <b>STM0653</b>                                                                 | <i>ybeL</i>        |                                         | <b>1.2</b>                                     |
| <b>STM0665</b>                                                                 | <i>gltI</i>        | Glutamate/aspartate transporter         | <b>1.8</b>                                     |
| <b>STM_R0126</b>                                                               | <i>sroC</i>        |                                         | <b>0.81</b>                                    |
| <b>STM0664</b>                                                                 | <i>gltJ</i>        |                                         | <b>1.3</b>                                     |
| <b>STM0663</b>                                                                 | <i>gltK</i>        |                                         | <b>1</b>                                       |
| <b>STM0662</b>                                                                 | <i>gltL</i>        |                                         | <b>1.9</b>                                     |
| <b>STM1285</b>                                                                 | <i>yeaG</i>        | Serine protein kinase (putative)        | <b>2.5</b>                                     |
| <b>STM1284</b>                                                                 | <i>yeaH</i>        |                                         | <b>2.5</b>                                     |
| <b>STM1303</b>                                                                 | <i>astC</i>        | Arginine/ornithine/glutamine metabolism | <b>2.4</b>                                     |

| Locus Tag <sup>a</sup> | Gene Symbol | Function                                  | WT/ $\Delta$ rpoN <sup>b</sup> |
|------------------------|-------------|-------------------------------------------|--------------------------------|
| STM1304                | <i>astA</i> |                                           | 2.4                            |
| STM1305                | <i>astD</i> |                                           | 2.6                            |
| STM1306                | <i>astB</i> |                                           | 3.3                            |
| STM1307                | <i>astE</i> |                                           | 2.4                            |
| STM1690                | <i>pspA</i> | Phage shock proteins                      | 17                             |
| STM1689                | <i>pspB</i> |                                           | 0.9                            |
| STM1688                | <i>pspC</i> |                                           | 4                              |
| STM1687                | <i>pspD</i> |                                           | 1.3                            |
| STM1686                | <i>pspE</i> |                                           | 1.5                            |
| STM2360                |             | Amino acid transport (putative)           | 100                            |
| STM2359                |             |                                           | 11                             |
| STM2358                |             |                                           | 18                             |
| STM2357                |             |                                           | 3.3                            |
| STM2356                | <i>ubiX</i> |                                           | 1.2                            |
| STM2840                |             | Nitric oxide reductase                    | 16                             |
| STM2841                | <i>ygbD</i> |                                           | 7.1                            |
| STM2842                | <i>hypF</i> | Hydrogenase maturation proteins           | 13                             |
| STM2843                | <i>hydN</i> |                                           | 14                             |
| STM2853                | <i>hycA</i> | Hydrogenase 3                             | 26                             |
| STM2852                | <i>hycB</i> |                                           | 12                             |
| STM2851                | <i>hycC</i> |                                           | 170                            |
| STM2850                | <i>hycD</i> |                                           | 1.9                            |
| STM2849                | <i>hycE</i> |                                           | 96                             |
| STM2848                | <i>hycF</i> |                                           | 25                             |
| STM2847                | <i>hycG</i> |                                           | 30                             |
| STM2846                | <i>hycH</i> |                                           | 6.4                            |
| STM2845                | <i>hycl</i> |                                           | 12                             |
| STM2844                |             |                                           | 9.4                            |
| STM2854                | <i>hypA</i> | Formate-hydrogen lyase system             | 5.6                            |
| STM2855                | <i>hypB</i> |                                           | 39                             |
| STM2856                | <i>hypC</i> |                                           | 6.3                            |
| STM2857                | <i>hypD</i> |                                           | 25                             |
| STM2858                | <i>hypE</i> |                                           | 31                             |
| STM3521                |             | RNA repair system (putative)              | 71                             |
| STM3519                | <i>rtcB</i> |                                           | 27                             |
| STM3518                | <i>rtcA</i> |                                           | 4.3                            |
| STM3568                | <i>rpoH</i> | Heat shock sigma factor ( $\sigma^{32}$ ) | 1.7                            |
| STM3772                |             | PTS system (putative)                     | 39                             |
| STM3771                |             |                                           | 37                             |
| STM3770                |             |                                           | 60                             |

| <b>Locus Tag<sup>a</sup></b>                                                     | <b>Gene Symbol</b> | <b>Function</b>                      | <b>WT/<math>\Delta</math>rpoN<sup>b</sup></b> |
|----------------------------------------------------------------------------------|--------------------|--------------------------------------|-----------------------------------------------|
| <b>STM3769.S</b>                                                                 |                    |                                      | <b>31</b>                                     |
| <b>STM3768</b>                                                                   |                    |                                      | <b>24</b>                                     |
| <b>STM3767</b>                                                                   |                    |                                      | <b>41</b>                                     |
| <b>STM3766</b>                                                                   |                    |                                      | <b>1.4</b>                                    |
| <b>STM4172</b>                                                                   | <i>zraP</i>        | Zinc resistance-associated protein   | <b>16</b>                                     |
| <b>STM4173</b>                                                                   | <i>hydH</i>        | Zinc resistance two-component system | <b>3.7</b>                                    |
| <b>STM4174</b>                                                                   | <i>hydG</i>        |                                      | <b>2.8</b>                                    |
| <b>STM4244</b>                                                                   | <i>pspG</i>        | Phage shock protein                  | <b>1.4</b>                                    |
| <b>STM4285</b>                                                                   | <i>fdhF</i>        | Formate dehydrogenase                | <b>29</b>                                     |
| <b>STM4535</b>                                                                   |                    | PTS system (putative)                | <b>16</b>                                     |
| <b>STM4536</b>                                                                   |                    |                                      | <b>1.7</b>                                    |
| <b>STM4537</b>                                                                   |                    |                                      | <b>66</b>                                     |
| <b>STM4538</b>                                                                   |                    |                                      | <b>13</b>                                     |
| <b>STM4539</b>                                                                   |                    |                                      | <b>43</b>                                     |
| <b>STM4540.S</b>                                                                 |                    |                                      | <b>25</b>                                     |
| <b>Novel <math>\sigma^{54}</math>-dependent operon:</b>                          |                    |                                      |                                               |
| <b>STM2944</b>                                                                   | <i>ygcB</i>        | CRISPR-associated proteins           | <b>1.6</b>                                    |
| <b>STM2943</b>                                                                   |                    |                                      | <b>1.2</b>                                    |
| <b>STM2942</b>                                                                   |                    |                                      | <b>1.3</b>                                    |
| <b>STM2941</b>                                                                   | <i>yghJ</i>        |                                      | <b>1.2</b>                                    |
| <b>STM2940</b>                                                                   |                    |                                      | <b>1.4</b>                                    |
| <b>STM2939</b>                                                                   | <i>ygcH</i>        |                                      | <b>2.8</b>                                    |
| <b>STM2938</b>                                                                   |                    |                                      | <b>4.1</b>                                    |
| <b>STM2937</b>                                                                   | <i>ygbF</i>        |                                      | <b>0.8</b>                                    |
| <b>Possible indirectly regulated <math>\sigma^{54}</math>-dependent operons:</b> |                    |                                      |                                               |
| <b>STM0144</b>                                                                   | <i>ppdD</i>        | Pilin biogenesis (putative)          | <b>0.78</b>                                   |
| <b>STM0143</b>                                                                   | <i>hofB</i>        |                                      | <b>3.3</b>                                    |
| <b>STM0142</b>                                                                   | <i>hofC</i>        |                                      | <b>2.2</b>                                    |
| <b>STM0515</b>                                                                   | <i>allA</i>        | Allantoin utilization                | <b>1.1</b>                                    |
| <b>STM0516</b>                                                                   | <i>allR</i>        |                                      | <b>1</b>                                      |
| <b>STM0517</b>                                                                   | <i>gcl</i>         |                                      | <b>2</b>                                      |
| <b>STM0518</b>                                                                   | <i>gip</i>         |                                      | <b>1.6</b>                                    |
| <b>STM0519</b>                                                                   | <i>glxR</i>        |                                      | <b>2</b>                                      |
| <b>STM0520</b>                                                                   |                    |                                      | <b>1.8</b>                                    |
| <b>STM0521</b>                                                                   | <i>ybbV</i>        |                                      | <b>1.3</b>                                    |
| <b>STM0523</b>                                                                   | <i>allB</i>        |                                      | <b>3.2</b>                                    |
| <b>STM0524</b>                                                                   | <i>ybbY</i>        |                                      | <b>1.4</b>                                    |
| <b>STM0525</b>                                                                   | <i>glxK</i>        |                                      | <b>0.99</b>                                   |
| <b>STM0791</b>                                                                   | <i>hutH</i>        | Histidine-ammonia lyase              | <b>3.8</b>                                    |

| <b>Locus Tag<sup>a</sup></b> | <b>Gene Symbol</b> | <b>Function</b>                               | <b>WT/<math>\Delta</math>rpoN<sup>b</sup></b> |
|------------------------------|--------------------|-----------------------------------------------|-----------------------------------------------|
| <b>STM1252</b>               |                    | Cytoplasmic protein (putative)                | <b>3.1</b>                                    |
| STM2038                      | <i>pduA</i>        | Propanediol utilization                       | 0.75                                          |
| STM2039                      | <i>pudB</i>        |                                               | 1.1                                           |
| STM2040                      | <i>pduC</i>        |                                               | 2                                             |
| STM2041                      | <i>pduD</i>        |                                               | 1.5                                           |
| STM2042                      | <i>pduE</i>        |                                               | 0.46                                          |
| <b>STM2043</b>               | <i>pduG</i>        |                                               | <b>3.3</b>                                    |
| STM2044                      | <i>pduH</i>        |                                               | 0.46                                          |
| STM2045                      | <i>pduJ</i>        |                                               | 0.58                                          |
| STM2046                      | <i>pduK</i>        |                                               | 0.7                                           |
| STM2047                      | <i>pduL</i>        |                                               | 4.3 <sup>c</sup>                              |
| STM2048                      | <i>pduM</i>        |                                               | 2.5                                           |
| STM2049                      | <i>pduN</i>        |                                               | 0.87                                          |
| STM2050                      | <i>pduO</i>        |                                               | 1.4                                           |
| STM2051                      | <i>pduP</i>        |                                               | 1.4                                           |
| STM2052                      | <i>pduQ</i>        |                                               | 1.5                                           |
| STM2053                      | <i>pduS</i>        |                                               | 1.7                                           |
| STM2054                      | <i>pduT</i>        |                                               | 1.8                                           |
| STM2055                      | <i>pduU</i>        |                                               | 0.94                                          |
| STM2056                      | <i>pduV</i>        |                                               | 0.61                                          |
| STM2057                      | <i>pduW</i>        | 2.1                                           |                                               |
| STM2058                      | <i>pduX</i>        | 1.6                                           |                                               |
| STM2149                      | <i>stcD</i>        | Chaperone-usher fimbriae (putative)           | 1.5                                           |
| <b>STM2150</b>               | <i>stcC</i>        |                                               | <b>3.2</b>                                    |
| STM2151                      | <i>stcB</i>        |                                               | 1.9                                           |
| STM2152                      | <i>stcA</i>        |                                               | 0.82                                          |
| <b>STM2572</b>               | <i>yfhH</i>        | Membrane transport protein (putative)         | <b>3.1</b>                                    |
| STM2773                      | <i>iroB</i>        | Siderophore production                        | 2.1                                           |
| STM2774                      | <i>iroC</i>        |                                               | 0.95                                          |
| <b>STM2775</b>               | <i>iroD</i>        |                                               | <b>4</b>                                      |
| STM2776                      | <i>iroE</i>        |                                               | 1.2                                           |
| <b>STM2839</b>               | <i>ygaA</i>        | EBP activator for STM2840 operon (putative)   | <b>3.2</b>                                    |
| <b>STM2859</b>               | <i>fhlA</i>        | EBP activator for <i>fdhF/hyc/hyp</i> operons | <b>3.5</b>                                    |
| STM2899                      | <i>invF</i>        | Cell invasion proteins                        | 2                                             |
| <b>STM2898</b>               | <i>invG</i>        |                                               | <b>5.9</b>                                    |
| STM2897                      | <i>invE</i>        |                                               | 1.7                                           |
| STM2896                      | <i>invA</i>        |                                               | 1.8                                           |
| STM2895                      | <i>invB</i>        |                                               | 1                                             |
| STM2894                      | <i>invC</i>        |                                               | 1.9                                           |
| STM2893                      | <i>invI</i>        |                                               | 0.9                                           |
| STM2892                      | <i>invJ</i>        |                                               | 2                                             |
| STM2891                      | <i>spaO</i>        |                                               | 1.9                                           |

| Locus Tag <sup>a</sup> | Gene Symbol | Function                               | WT/ $\Delta rpoN$ <sup>b</sup> |
|------------------------|-------------|----------------------------------------|--------------------------------|
| STM2890                | <i>spaP</i> |                                        | 1.6                            |
| STM2889                | <i>spaQ</i> |                                        | 0.69                           |
| STM2888                | <i>spaR</i> |                                        | 2.7                            |
| STM2887                | <i>spaS</i> |                                        | 1.4                            |
| STM2886                | <i>sicA</i> |                                        | 0.71                           |
| STM2885                | <i>sipB</i> |                                        | 1.1                            |
| STM2884                | <i>sipC</i> |                                        | 1.1                            |
| STM2883                | <i>sipD</i> |                                        | 1.2                            |
| STM2882                | <i>sipA</i> |                                        | 1.7                            |
| STM3253                |             | PTS system/sugar metabolism (putative) | 1.5                            |
| STM3254                |             |                                        | 1.8                            |
| STM3255                |             |                                        | 1                              |
| <b>STM3256</b>         |             |                                        | <b>3.7</b>                     |
| STM3257                |             |                                        | 2.9                            |
| STM3258                |             |                                        | 1.4                            |
| STM3259                |             |                                        | 1.1                            |
| STM3260                |             |                                        | 2                              |
| STM3261                |             |                                        | 1.3                            |
| STM3262                |             |                                        | 1                              |

<sup>a</sup> Locus tags for all genes within operons in which at least one gene was up-regulated  $\geq 3$ -fold (p-value  $< 0.02$ ) by RpoN in the microarray analysis; up-regulated genes are in **black** type and genes below the 3-fold cut off are in **grey** type). The up-regulated operons are grouped as known, predicted, novel, or possible indirectly regulated, as defined in Results.

<sup>b</sup> Both WT and  $\Delta rpoN$  strains contain pPBHP92 expressing DctD250. Signal ratios below the 3-fold cutoff for up-regulation are displayed in **grey**.

<sup>c</sup> above 3-fold cutoff, but p-value  $> 0.02$
