# Supplementary material for: Use of a promiscuous, constitutively-active bacterial enhancer-binding protein to define the σ54 (RpoN) regulon of Salmonella Typhimurium LT2
Source: PubMed Central journal article supplement (PMC3844500; doi:10.1186/1471-2164-14-602), 2013-09-05
Supplement: 1471-2164-14-602-S2.pdf [file 1471-2164-14-602-S2.pdf]

**Additional File 2: Sequences used to generate the Position-Specific Score Matrix (PSSM)**

| Locus     | Gene        | Sequence            |
|-----------|-------------|---------------------|
| STM0368   | <i>prpB</i> | TGGCATAGCCTTTGCTTT  |
| STM0462   | <i>glnK</i> | TGGCACATCCTTTGCAAT  |
| STM0577   |             | TGGCACGCCGTTTGCCAT  |
| STM0649.S |             | TGGCACGCCTTTTGATTA  |
| STM0665   | <i>gltI</i> | TGGCACGTCTATTGCTTT  |
| STM0830   | <i>glnH</i> | TGGCATGATTTTTTCATT  |
| STM1285   | <i>yeaG</i> | TGGCATGAGAGTTGCTTT  |
| STM1303   | <i>argD</i> | TGGCACGAATGCTGCAAT  |
| STM1690   | <i>pspA</i> | TGGCACGCAAATTGTATT  |
| STM2354*  | <i>hisJ</i> | TGGCACGATAGTCGCATC  |
| STM2355   | <i>argT</i> | TGGCATAAGACCTGCATG  |
| STM2360   |             | TGGCATGCCTTTTGCTTT  |
| STM_R0152 | <i>glmY</i> | TGGCACAATTACTGCATA  |
| STM2840   |             | TGGCACACTAGCTGCAAT  |
| STM2843   | <i>hydN</i> | TGGCACGATTCGTGTATA  |
| STM2853   | <i>hycA</i> | TGGCATGGAAAATGCTTA  |
| STM2854   | <i>hypA</i> | TGGCATAAATATTGCTTT  |
| STM3521   |             | TGGCACGCTGGTTGCAAT  |
| STM3568   | <i>rpoH</i> | TGGCACGGTTGTTGCTCG  |
| STM3772   |             | TGGCACAACCTTTGCTCT  |
| STM_R0167 | <i>glmZ</i> | TGGCACGTTATGTGCAAT  |
| STM4007   | <i>glnA</i> | TGGCACAGATTTTCGCTTT |
| STM4172   | <i>zraP</i> | TGGCACGGAAGATGCAAG  |
| STM4173   | <i>hydH</i> | TGGCATGATCTCTGCTTA  |
| STM4244   | <i>pspG</i> | TGGCATGATTTTTGTAAG  |
| STM4285   | <i>fdhF</i> | TGGCATAAAACATGCATA  |
| STM4535   |             | TGGCACGCCGCTTGCTCT  |

\*Although this sequence has been predicted to be a  $\sigma^{54}$ -dependent promoter, there is evidence indicating that this is not an active promoter [2].
