# Supplementary material for: Use of a promiscuous, constitutively-active bacterial enhancer-binding protein to define the σ54 (RpoN) regulon of Salmonella Typhimurium LT2
Source: PubMed Central journal article supplement (PMC3844500; doi:10.1186/1471-2164-14-602), 2013-09-05
Supplement: 1471-2164-14-602-S3.pdf [file 1471-2164-14-602-S3.pdf]

**Additional File 3: Oligonucleotides used in this study**

| <b>Name</b>               | <b>Forward</b>                   | <b>Reverse</b>                   |
|---------------------------|----------------------------------|----------------------------------|
| pDS11MCS                  | CTAGAATTGAGCTCATTTGGTACCATTG     | GATCCAATGGTACCAATGAGCTCAATT      |
| pDS12MCS                  | AGCTTAGATCTCTAGAGTCGACGGTACCATTG | GATCCAATGGTACCGTCGACTCTAGAGATCTA |
| LM-PCR linker             | AGAAGCTTGAATTCGAGCAGTCAG         | CTGCTCGAATTC AAGCTTCT            |
| DctD                      | ATTGGATCCCACCTCGACCGGAATTATCG    | TTTTATCAGACCGCTTCTGC             |
| STM0224 ( <i>yaeT</i> )   | GACATGAGTCCTTAGTCCG              | AGGTAACATTACGCTATGGG             |
| STM0334                   | CGATAGCGGAAACAAAACCG             | TCAGGAAGCGAATATCTGGG             |
| STM0462 ( <i>glnK</i> )   | TCGCCCATCATGCACCGTCG             | TCCCTGAATGCCAATGGAAG             |
| STM0504 ( <i>ybbN</i> )   | AGGGCGATGTCTTAGTCC               | AGGACCTTCCAAAACGCG               |
| STM0699                   | CTCTGCCCGTATGTTGTCCC             | ATACGCACCACGCAAACCG              |
| STM0961 ( <i>lolA</i> )   | GGTAGCCTGTTCTACAAAACGG           | GGAGTGTGAAAACCTGAGG              |
| STM1285 ( <i>yeaG</i> )   | GTAGAGGCTCCCGGAAGAGG             | ATCCACCAGCCTTTTCTACC             |
| STM1586                   | GCGTTTTACCGTCTGCCG               | GTAAGAAGTTGCTGGATGACGG           |
| STM1594                   | CTCTGGATGTACTCGACGG              | AGATACTCAAACTACGCAGCG            |
| STM1697                   | GGAAATAACGTGCCCTGGG              | ATCTGTTGCGGACAATCGC              |
| STM2016 ( <i>cobT</i> )   | TGGCTTTCTTTCTACTCGG              | GGCAGGACAATATTACTGGC             |
| STM2430 ( <i>cysK</i> )   | AGCTGCAGGAAGATGAAAGC             | GAATCAATGCCAGGTGAGG              |
| STM_R0152 ( <i>glmY</i> ) | AAGGGGCTGACATAAGAAGG             | TTAGGTGTTGCAGGTGTTGC             |
| STM2939                   | TGAACACGATGGCTTAACGG             | CATCAGCAAATCGTGACGC              |
| STM2957 ( <i>rumA</i> )   | CGTCAATGTGCAACAGTGCC             | CGACCATTGCTGGTTTTACCG            |
| STM3127                   | GGACTGTTTTTCATCGACCC             | GGTAAATAACGTTGTGACGC             |
| STM3521                   | AAGCGTAGAATCTAAAGGAAG            | AGGGAATTGTCGCTTGCC               |
| STM3568 ( <i>rpoH</i> )   | CAAATCCTCTCAATCAGTATTGC          | GTTTCGAGGAAAGAGTCC               |
| STM_R0167 ( <i>glmZ</i> ) | TTCTGTCTCCACCGGGCGA              | TCCAGGGTGTGATGAGG                |
| STM4007                   | GCGCGTTATTGTACACGG               | TGTA CTCTCCCGATTGG               |
